# Supplementary material for: The Influence of the Thickness of Compact TiO2 Electron Transport Layer on the Performance of Planar CH3NH3PbI3 Perovskite Solar Cells
Source: MDPI journal article supplement (doi:10.3390/ma14123295), 2021-06-14
Supplement: s1 [file s1]

## Supplementary Materials

# The Influence of the Thickness of Compact TiO<sub>2</sub> Electron Transport Layer on the Performance of Planar CH<sub>3</sub>NH<sub>3</sub>PbI<sub>3</sub> Perovskite Solar Cells

Andrzej Sławek<sup>1,2</sup>, Zbigniew Starowicz<sup>1</sup> and Marek Lipiński<sup>1,\*</sup>

<sup>1</sup> Institute of Metallurgy and Materials Science, Polish Academy of Sciences, ul. Reymonta 25, 30-059 Kraków, Poland; aslawek@agh.edu.pl (A.S.); z.starowicz@imim.pl (Z.S.)

<sup>2</sup> Academic Centre for Materials and Nanotechnology, AGH University of Science and Technology, al. Mickiewicza 30, 30-059 Kraków, Poland

\* Correspondence: m.lipinski@imim.pl

**Citation:** Sławek, A.; Starowicz, Z.; Lipiński, M. The Influence of the Thickness of Compact TiO<sub>2</sub> Electron Transport Layer on the Performance of Planar CH<sub>3</sub>NH<sub>3</sub>PbI<sub>3</sub> Perovskite Solar Cells. *Materials* **2021**, *14*, 3295. <https://doi.org/10.3390/ma14123295>

Academic Editor: Gregory J. Wilson

Received: 21 May 2021

Accepted: 9 June 2021

Published: 14 June 2021

**Publisher's Note:** MDPI stays neutral with regard to jurisdictional claims in published maps and institutional affiliations.

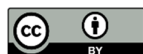

**Copyright:** © 2021 by the authors. Submitted for possible open access publication under the terms and conditions of the Creative Commons Attribution (CC BY) license (<http://creativecommons.org/licenses/by/4.0/>).

**Table S1.** Parameters from ellipsometry measurements for the studied c-TiO<sub>2</sub> layers on polished silicon wafers. Real part of the refractive index  $n_{632.8\text{nm}}$  and Mean Square Error indicate fit quality. Final thickness  $d_{\text{effTiO}_2}$  is as sum of thickness of TiO<sub>2</sub>  $d_{\text{TiO}_2}$  and half of roughness  $d_R$ .

| Sample      | $n_{632.8\text{nm}}$ | MSE   | $d_{\text{TiO}_2}$ [nm] | $d_R$ [nm] | $d_{\text{effTiO}_2}$ [nm] |
|-------------|----------------------|-------|-------------------------|------------|----------------------------|
| 0.1M_4kRPM  | 1.9239               | 0.614 | 6.7                     | 1.4        | 6.7                        |
| 0.1M_3kRPM  | 1.9027               | 0.572 | 7.9                     | 2.2        | 7.9                        |
| 0.1M_2kRPM  | 2.0112               | 0.499 | 9.1                     | 4.5        | 9.1                        |
| 0.2M_4kRPM  | 2.007                | 0.69  | 13.5                    | 0.2        | 13.5                       |
| 0.2M_3kRPM  | 1.9956               | 0.591 | 15.9                    | 0.5        | 15.9                       |
| 0.2M_2kRPM  | 2.0442               | 0.617 | 19.5                    | 2.0        | 19.5                       |
| 0.3M_4kRPM  | 2.1271               | 1.314 | 20.9                    | 1.0        | 20.9                       |
| 0.3M_3kRPM  | 2.0553               | 1.276 | 24.4                    | 1.3        | 24.4                       |
| 0.3M_2kRPM  | 2.0626               | 1.202 | 29.2                    | 1.3        | 29.2                       |
| 0.5M_4kRPM  | 2.0734               | 3.075 | 36.9                    | 1.6        | 36.9                       |
| 0.5M_3kRPM  | 2.0494               | 1.472 | 43.6                    | 0.0        | 43.6                       |
| 0.5M_2kRPM  | 2.1027               | 3.055 | 52.5                    | 1.4        | 52.5                       |
| 0.75M_4kRPM | 2.0622               | 2.007 | 59.4                    | 0.0        | 59.4                       |
| 0.75M_3kRPM | 2.1032               | 2.811 | 67.8                    | 2.0        | 67.8                       |
| 0.75M_2kRPM | 2.0996               | 4.678 | 83.0                    | 0.0        | 83.0                       |
| 1M_4kRPM    | 2.0544               | 2.578 | 88.3                    | 0.0        | 88.3                       |
| 1M_3kRPM    | 2.1420               | 9.831 | 97.6                    | 0.0        | 97.6                       |
| 1M_2kRPM    | 2.1417               | 7.609 | 124.2                   | 0.00       | 124.2                      |

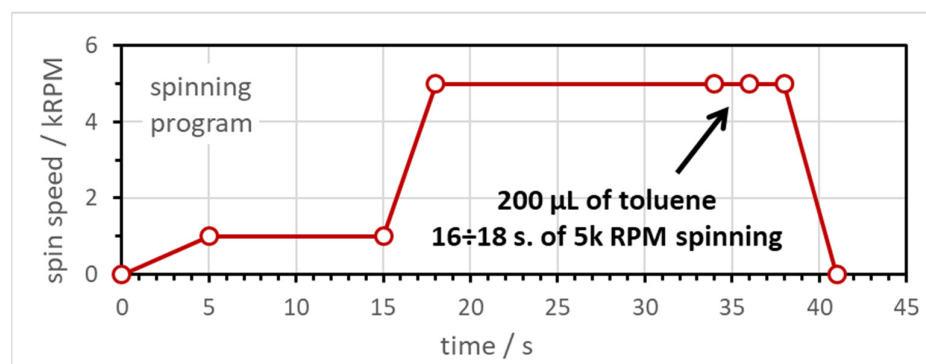

**Figure S1.** Spin coating program for deposition of MAPbI<sub>3</sub> perovskite precursor. Approximate moment of adding toluene antisolvent is marked.

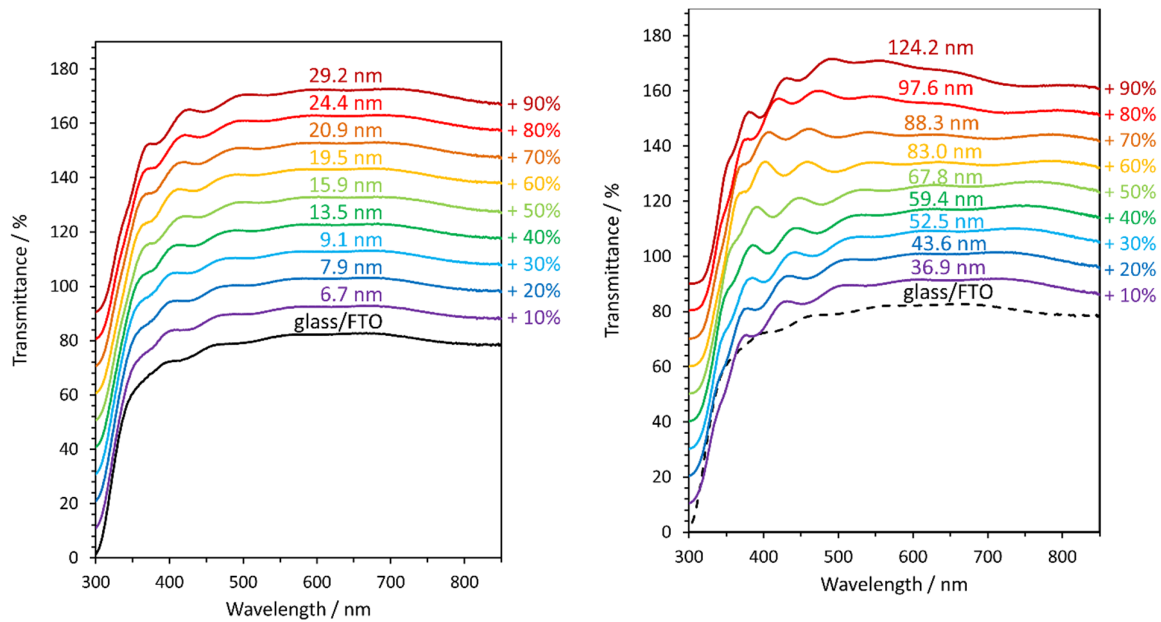

**Figure S2.** UV-VIS-NIR spectra of the glass/FTO/c-TiO<sub>2</sub> samples under this study. For clarity, the spectra were artificially shifted on the ordinate axis.

**Table S2.** Electrical parameters of the studied FTO/b-TiO<sub>2</sub>/MAPbI<sub>3</sub>/Spiro-OMeTAD/Au solar cells: short circuit current density  $J_{sc}$ , open circuit voltage  $V_{oc}$ , fill factor FF and power conversion efficiency PCE. All parameters were averaged for a maximum of 4 separate cells from the same glass substrate, where faulty cells were rejected. The scan rate was 1000 mV·s<sup>-1</sup> for both forward and reverse scanning directions. Prior to measurements cells were conditioned under Xe lamp for 5 seconds.

| Sample     | Scan    | d <sub>c-TiO2</sub><br>[nm] | No. of<br>cells | J <sub>sc</sub><br>[mA/cm <sup>2</sup> ] | V <sub>oc</sub><br>[mV] | FF<br>[–] | PCE<br>[%] |
|------------|---------|-----------------------------|-----------------|------------------------------------------|-------------------------|-----------|------------|
| glass/FTO  | Reverse | 0                           | 4               | 4.17                                     | 184                     | 0.29      | 0.68       |
|            |         |                             |                 | ± 5.16                                   | ± 184                   | ± 0.04    | ± 0.80     |
|            | Forward |                             |                 | 0.88                                     | 115                     | 0.18      | 0.02       |
|            |         |                             |                 | ± 0.75                                   | ± 94                    | ± 0.09    | ± 0.03     |
| 0.1M_4kRPM | Reverse | 6.7                         | 3               | 20.38                                    | 726                     | 0.50      | 8.49       |
|            |         |                             |                 | ± 1.12                                   | ± 51                    | ± 0.04    | ± 1.68     |
|            | Forward |                             |                 | 20.41                                    | 470                     | 0.25      | 2.84       |
|            |         |                             |                 | ± 1.15                                   | ± 71                    | ± 0.08    | ± 1.37     |
| 0.1M_3kRPM | Reverse | 7.9                         | 3               | 18.82                                    | 638                     | 0.45      | 6.19       |
|            |         |                             |                 | ± 1.41                                   | ± 38                    | ± 0.02    | ± 0.90     |
|            | Forward |                             |                 | 18.30                                    | 367                     | 0.17      | 1.30       |
|            |         |                             |                 | ± 2.28                                   | ± 39                    | ± 0.03    | ± 0.49     |
| 0.1M_2kRPM | Reverse | 9.1                         | 4               | 19.05                                    | 891                     | 0.57      | 11.12      |
|            |         |                             |                 | ± 0.25                                   | ± 20                    | ± 0.02    | ± 0.62     |
|            | Forward |                             |                 | 19.21                                    | 649                     | 0.35      | 4.95       |
|            |         |                             |                 | ± 0.31                                   | ± 40                    | ± 0.04    | ± 0.82     |

|             |         |      |   |        |      |        |        |
|-------------|---------|------|---|--------|------|--------|--------|
| 0.2M_4kRPM  | Reverse | 13.5 | 0 | —      | —    | —      | —      |
|             | Forward |      |   | —      | —    | —      | —      |
| 0.2M_3kRPM  | Reverse | 15.9 | 4 | 21.29  | 892  | 0.62   | 13.36  |
|             |         |      |   | ± 0.36 | ± 28 | ± 0.03 | ± 1.23 |
|             | Forward |      |   | 21.36  | 673  | 0.43   | 7.16   |
|             |         |      |   | ± 0.36 | ± 56 | ± 0.05 | ± 1.58 |
| 0.2M_2kRPM  | Reverse | 19.5 | 4 | 19.01  | 949  | 0.66   | 13.59  |
|             |         |      |   | ± 0.20 | ± 23 | ± 0.02 | ± 0.63 |
|             | Forward |      |   | 19.07  | 751  | 0.51   | 8.29   |
|             |         |      |   | ± 0.17 | ± 41 | ± 0.03 | ± 0.83 |
| 0.3M_4kRPM  | Reverse | 20.9 | 3 | 19.93  | 890  | 0.64   | 12.86  |
|             |         |      |   | ± 0.05 | ± 18 | ± 0.01 | ± 0.40 |
|             | Forward |      |   | 20.12  | 683  | 0.45   | 6.99   |
|             |         |      |   | ± 0.12 | ± 14 | ± 0.04 | ± 0.72 |
| 0.3M_3kRPM  | Reverse | 24.4 | 4 | 20.05  | 889  | 0.63   | 12.82  |
|             |         |      |   | ± 0.29 | ± 14 | ± 0.02 | ± 0.48 |
|             | Forward |      |   | 20.07  | 700  | 0.50   | 7.98   |
|             |         |      |   | ± 0.28 | ± 34 | ± 0.05 | ± 1.05 |
| 0.3M_2kRPM  | Reverse | 29.2 | 4 | 19.21  | 887  | 0.64   | 12.34  |
|             |         |      |   | ± 0.23 | ± 20 | ± 0.04 | ± 1.00 |
|             | Forward |      |   | 19.23  | 721  | 0.53   | 8.38   |
|             |         |      |   | ± 0.24 | ± 38 | ± 0.04 | ± 0.99 |
| 0.5M_4kRPM  | Reverse | 36.9 | 4 | 17.40  | 947  | 0.63   | 11.87  |
|             |         |      |   | ± 0.53 | ± 26 | ± 0.02 | ± 0.61 |
|             | Forward |      |   | 17.07  | 792  | 0.47   | 7.19   |
|             |         |      |   | ± 0.55 | ± 43 | ± 0.04 | ± 0.96 |
| 0.5M_3kRPM  | Reverse | 43.6 | 3 | 18.36  | 910  | 0.60   | 11.38  |
|             |         |      |   | ± 0.21 | ± 49 | ± 0.05 | ± 1.66 |
|             | Forward |      |   | 17.98  | 742  | 0.49   | 7.54   |
|             |         |      |   | ± 0.09 | ± 92 | ± 0.05 | ± 1.62 |
| 0.5M_2kRPM  | Reverse | 52.5 | 3 | 16.24  | 907  | 0.62   | 10.52  |
|             |         |      |   | ± 0.10 | ± 34 | ± 0.03 | ± 0.90 |
|             | Forward |      |   | 16.02  | 790  | 0.49   | 7.07   |
|             |         |      |   | ± 0.12 | ± 42 | ± 0.02 | ± 0.63 |
| 0.75M_4kRPM | Reverse | 59.4 | 4 | 16.44  | 906  | 0.64   | 10.81  |
|             |         |      |   | ± 0.26 | ± 11 | ± 0.01 | ± 0.22 |
|             | Forward |      |   | 16.11  | 825  | 0.54   | 8.13   |
|             |         |      |   | ± 0.22 | ± 23 | ± 0.02 | ± 0.52 |
| 0.75M_3kRPM | Reverse | 67.8 | 4 | 14.56  | 864  | 0.61   | 8.74   |

|             |         |       |   |            |          |            |            |
|-------------|---------|-------|---|------------|----------|------------|------------|
|             |         |       |   | $\pm 0.76$ | $\pm 21$ | $\pm 0.03$ | $\pm 0.82$ |
|             |         |       |   | 14.82      | 766      | 0.45       | 5.81       |
|             |         |       |   | $\pm 0.23$ | $\pm 53$ | $\pm 0.08$ | $\pm 1.29$ |
| 0.75M_2kRPM | Reverse | 83.0  | 3 | 14.67      | 872      | 0.65       | 9.46       |
|             |         |       |   | $\pm 0.27$ | $\pm 13$ | $\pm 0.02$ | $\pm 0.30$ |
|             | Forward |       |   | 14.60      | 821      | 0.56       | 7.69       |
|             |         |       |   | $\pm 0.29$ | $\pm 12$ | $\pm 0.04$ | $\pm 0.51$ |
| 1M_4kRPM    | Reverse | 88.3  | 4 | 14.42      | 851      | 0.63       | 8.74       |
|             |         |       |   | $\pm 0.07$ | $\pm 37$ | $\pm 37$   | $\pm 0.66$ |
|             | Forward |       |   | 14.30      | 784      | 0.53       | 6.79       |
|             |         |       |   | $\pm 0.10$ | $\pm 25$ | $\pm 0.01$ | $\pm 0.28$ |
| 1M_3kRPM    | Reverse | 97.6  | 2 | 14.49      | 865      | 0.64       | 9.05       |
|             |         |       |   | $\pm 0.17$ | $\pm 5$  | $\pm 0.02$ | $\pm 0.52$ |
|             | Forward |       |   | 14.35      | 809      | 0.58       | 7.57       |
|             |         |       |   | $\pm 0.10$ | $\pm 6$  | $\pm 0.01$ | $\pm 0.08$ |
| 1M_2kRPM    | Reverse | 124.2 | 4 | 13.08      | 791      | 0.62       | 7.29       |
|             |         |       |   | $\pm 0.26$ | $\pm 43$ | $\pm 0.03$ | $\pm 0.88$ |
|             | Forward |       |   | 13.09      | 749      | 0.53       | 5.88       |
|             |         |       |   | $\pm 0.26$ | $\pm 49$ | $\pm 0.02$ | $\pm 0.68$ |

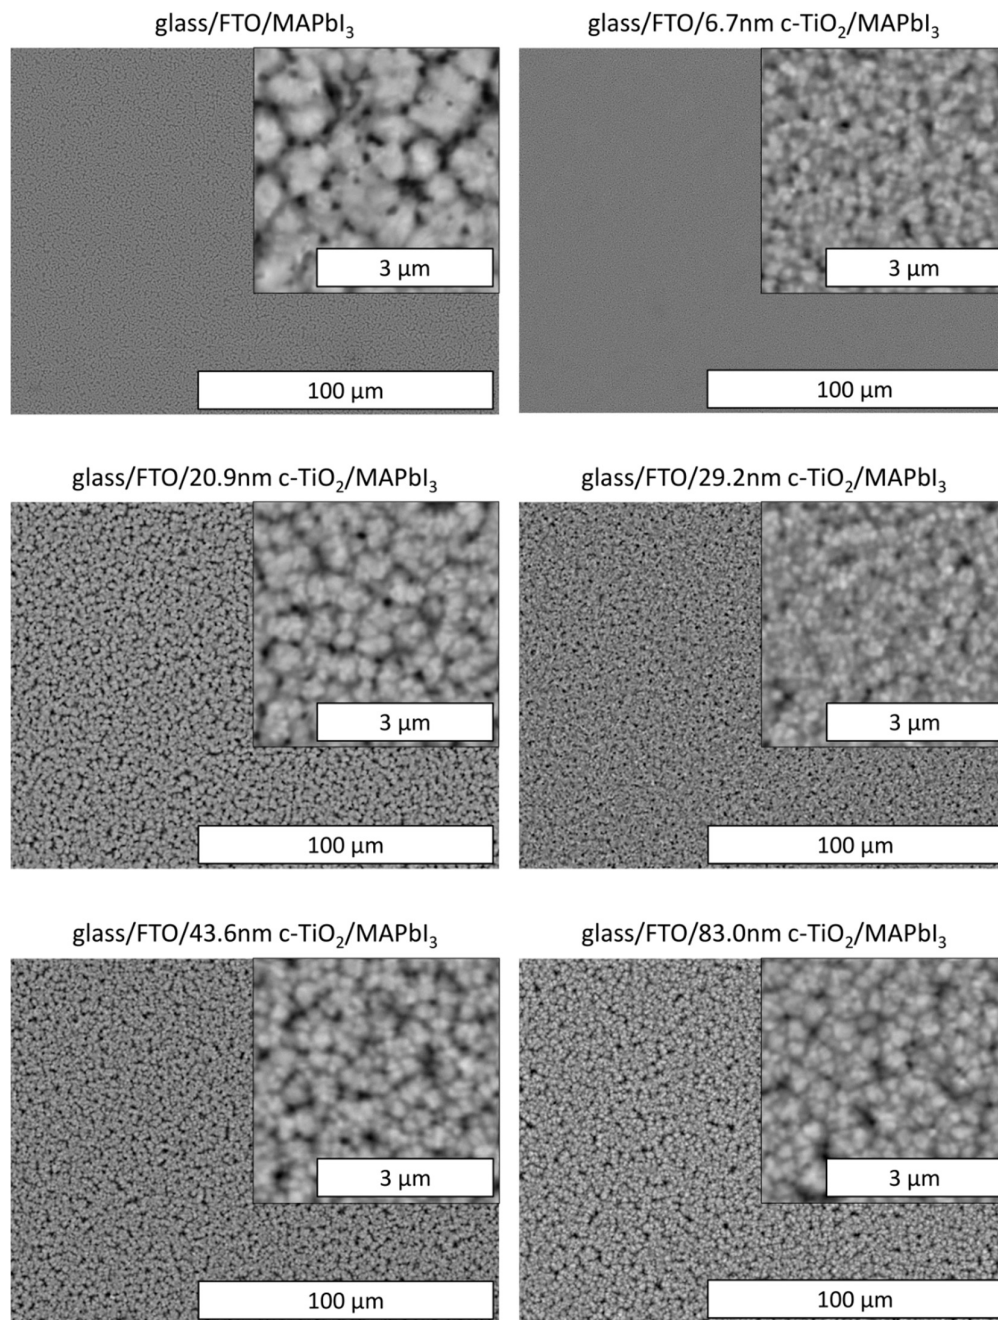

**Figure S3.** SEM images showing the morphology of the MAPbI<sub>3</sub> perovskite layer deposited on glass/FTO/c-TiO<sub>2</sub>, where the TiO<sub>2</sub> layer differed in thickness. Scale bars are also presented.
